# Supplementary material for: Marrubiin Inhibits Peritoneal Inflammatory Response Induced by Carrageenan Application in C57 Mice
Source: MDPI journal article supplement (doi:10.3390/ijms25084496), 2024-04-19
Supplement: s1 [file s1]

# Supplementary Material

## Marrubiin Inhibits Peritoneal Inflammatory Response Induced by Carrageenan Application in C57 Mice

Niko S. Radulović <sup>1,\*</sup>, Miljana R. Đorđević Zlatković <sup>1</sup>, Nikola M. Stojanović <sup>2</sup>, Milan S. Nešić <sup>1</sup>, Dragan B. Zlatković <sup>1</sup>, Milena S. Potić Floranović <sup>3</sup>, Dragana S. Tričković Vukić <sup>3</sup> and Pavle J. Randjelović <sup>2</sup>

<sup>1</sup> Department of Chemistry, Faculty of Sciences and Mathematics, University of Niš, 18000 Niš, Serbia; miljana.djordjevic@pmf.edu.rs (M.R.Đ.Z.); nesicmilanvl@gmail.com (M.S.N.); dragan.zlatkovic@gmail.com (D.B.Z.)

<sup>2</sup> Department of Physiology, Faculty of Medicine, University of Niš, 18000 Niš, Serbia; nikola.st90@yahoo.com (N.M.S.); pavleus@gmail.com (P.J.R.)

<sup>3</sup> Scientific Research Centre for Biomedicine, Faculty of Medicine, University of Niš, 18000 Niš, Serbia; milenapotic@yahoo.com (M.S.P.F.); draganavukic18@gmail.com (D.S.T.V.)

\* Correspondence: nikoradulovic@yahoo.com

### Table of contents:

|                                                                                 | page |
|---------------------------------------------------------------------------------|------|
| Figure S1: <sup>1</sup> H NMR spectrum of marrubiin (MAR)                       | 2    |
| Figure S2: <sup>13</sup> C NMR spectrum of MAR                                  | 2    |
| Figure S3: <sup>1</sup> H NMR spectrum of MAR after 10 years of storage at 4 °C | 3    |

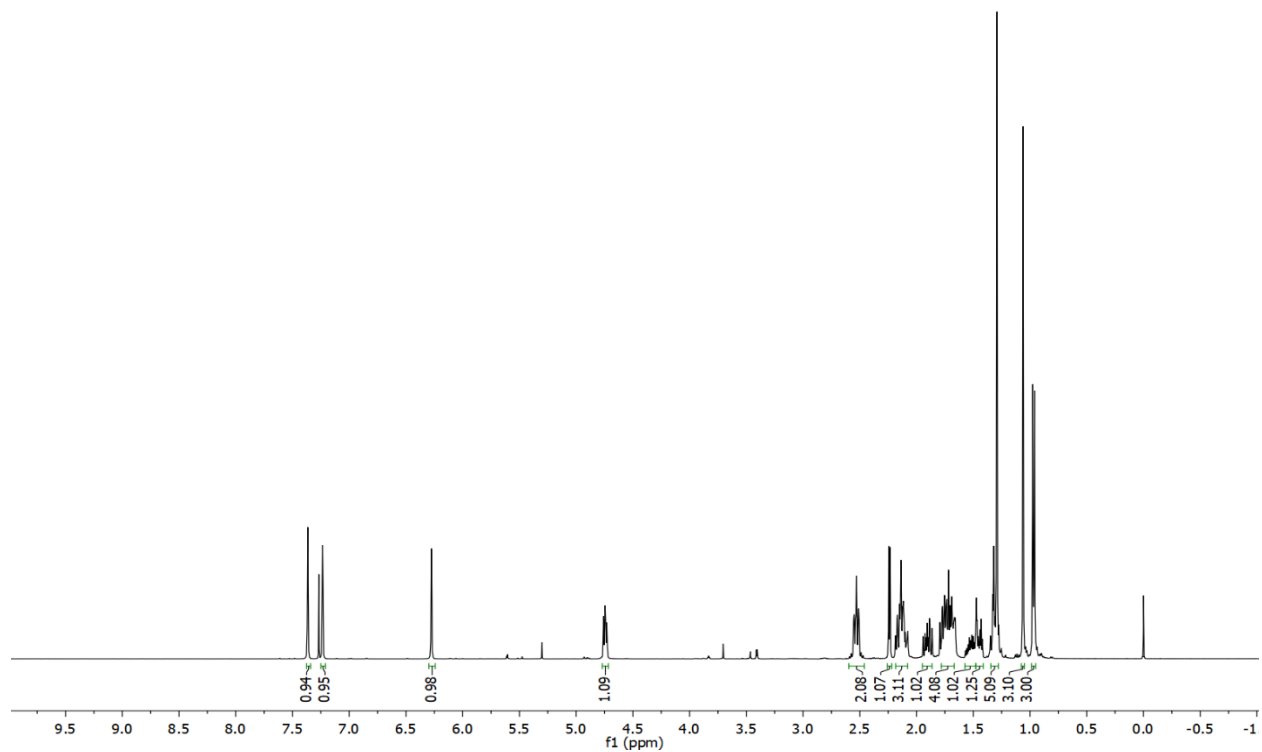

**Figure S1.**  $^1\text{H}$  NMR (400 MHz) spectrum of marrubiin (MAR) in  $\text{CDCl}_3$

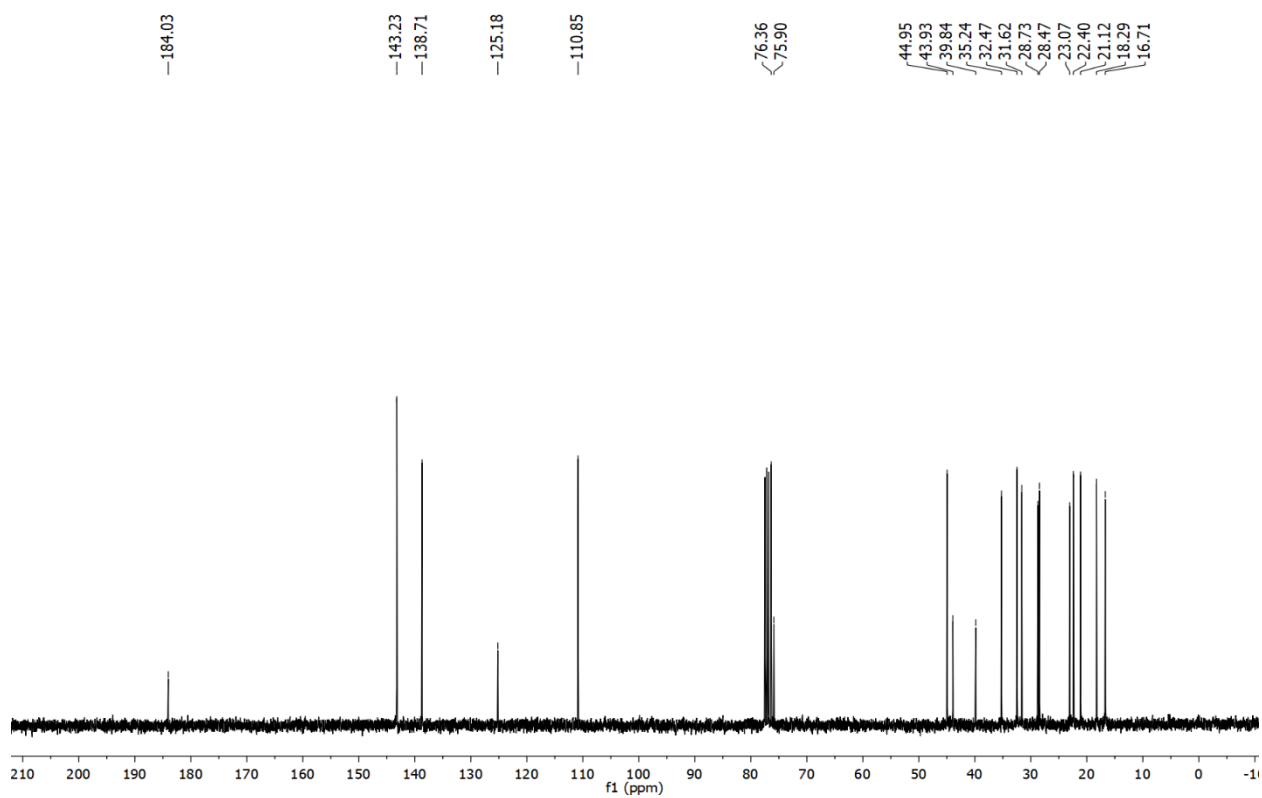

**Figure S2.**  $^{13}\text{C}$  NMR (100.6 MHz) spectrum of MAR in  $\text{CDCl}_3$

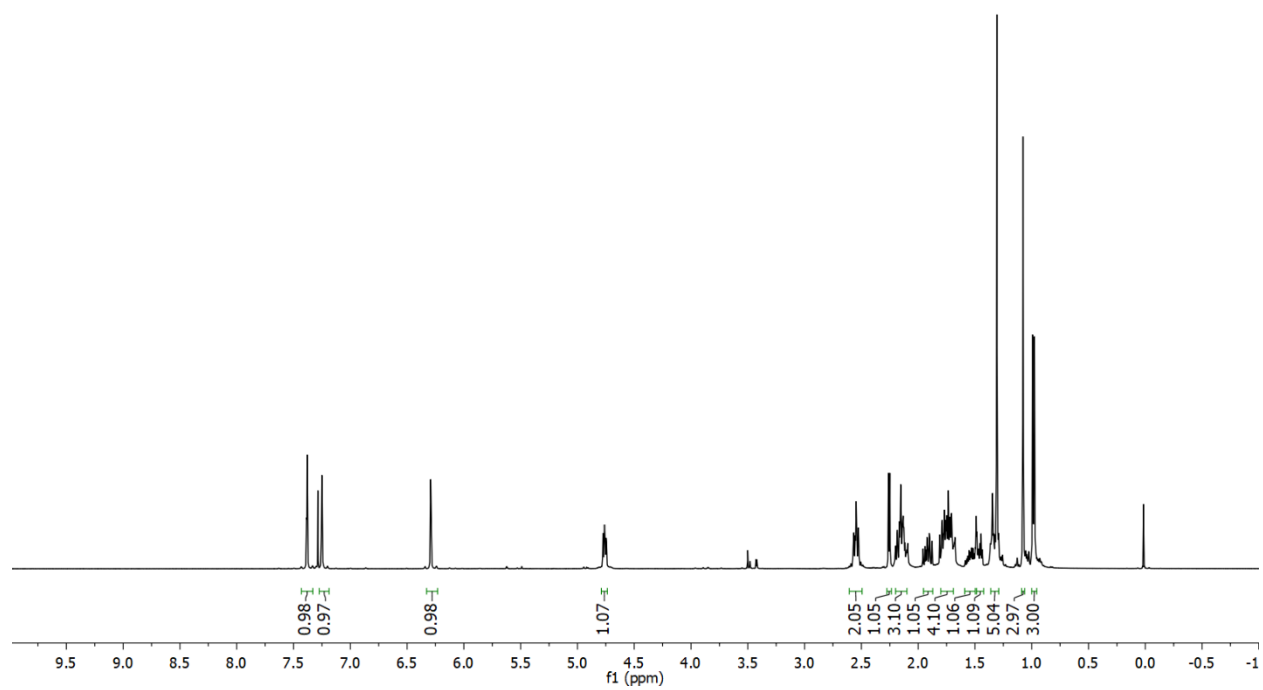

**Figure S3.**  $^1\text{H}$  NMR (400 MHz,  $\text{CDCl}_3$ ) spectrum of MAR after 10 years of storage at 4 °C. No degradation of MAR can be observed.
